# Supplementary material for: s ·nr: a visual analytics framework for contextual analyses of private and public RNA-seq data
Source: PubMed Central journal article supplement (PMC6346532; doi:10.1186/s12864-018-5396-0), 2019-01-24
Supplement: 12864_2018_5396_MOESM1_ESM.pdf [file 12864_2018_5396_MOESM1_ESM.pdf]

---

# **Interview Structure & Questionnaire**

PAUL KLEMM, PETER FROMMOLT, JAN-WILHELM  
KORNFELD

2018-03-08

## Contents

|                                                |          |
|------------------------------------------------|----------|
| <b>Interview Structure &amp; Questionnaire</b> | <b>2</b> |
| Interview Structure . . . . .                  | 2        |
| Questionnaire . . . . .                        | 3        |

## Interview Structure & Questionnaire

### Interview Structure

- *1. Introduction (5 Minutes)*
  - Goal: Explain the situation and also state the scheduled time for the interview
  - Short introduction of ourselves as well as the goals:
    - \* We want to create a workflow for analyzing NGS data that provides integrated visualization and data mining techniques
    - \* The goal of the interview is to find out as much about your background, tasks and goals when analyzing NGS data and what the major challenges are
  - Ask if it is ok to record audio of the interview. It will not be played to anybody except the attendees of the interview!
- *2. Warm-Up (5 Minutes)*
  - Goal: Spend 5 minutes of small talk, make interview partner feel comfortable with the situation
  - Questions derived from the table below
- *3. Main Phase (45 Minutes)*
  - Goal: Derive as many information about user, task and context as possible
  - Questions derived from the table below
- *4. Cooling-off*
  - Goal: Make participant feel good about the interview and reduce cognitive load of all involved
  - Questions derived from the table below
- *5. Closure*
  - Thank interviewee for the time
  - Explain the further steps
    - \* We will compile a list of tasks and come up with ideas for our design
    - \* Prototypical implementations need to be tested
    - \* It would be helpful if interviewee can help here

## Questionnaire

| Question                                                                              | User | Task | Context |
|---------------------------------------------------------------------------------------|------|------|---------|
| Introduction (5 Minutes)                                                              |      |      |         |
| Please explain briefly your scientific background and training                        | x    | -    | -       |
| Where do you spend the majority of your work time? (computer, lab, somewhere else)    | x    | -    | x       |
| What is your main research question?                                                  | x    | x    | -       |
| Warm-Up (5 Minutes)                                                                   |      |      |         |
| Main Phase (45 Minutes)                                                               |      |      |         |
| NGS data: Who processes the data?                                                     | x    | -    | -       |
| Which alternatives do you have when Peter does not analyze the data?                  | x    | -    | x       |
| What format does the processed data have? (Excel)                                     | -    | -    | x       |
| Would you rather have it in a different format?                                       | -    | -    | x       |
| <b>Which major tools do you use for on the processed data?</b>                        | -    | -    | x       |
| <b>Name three things that annoy you the most when analyzing or handling the data?</b> | -    | x    | -       |
| <b>You have the tool to see precisely what you want in the data. What do you see?</b> | -    | x    | x       |
| <b>What data analyses do you want to apply, but they take too much time</b>           | -    | x    | -       |
| <b>Which plots do you use to get insight into your data?</b>                          | -    | x    | x       |
| Which plots do you use to communicate the results?                                    | -    | x    | x       |
| Cooling Off (10 Minutes)                                                              |      |      |         |
| Do you discuss the data with anybody?                                                 | x    | x    | x       |
| Which important finding did you get using NGS data analysis                           | x    | x    | x       |
| Is it possible that I attend a analysis session to learn more about the approach?     | -    | -    | -       |
| Can we get a data set later on to include in our prototype?                           | -    | -    | -       |
