# Supplementary material for: s ·nr: a visual analytics framework for contextual analyses of private and public RNA-seq data
Source: PubMed Central journal article supplement (PMC6346532; doi:10.1186/s12864-018-5396-0), 2019-01-24
Supplement: 12864_2018_5396_MOESM5_ESM.pdf [file 12864_2018_5396_MOESM5_ESM.pdf]

---

## **Setup s·nr**

PAUL KLEMM, PETER FROMMOLT, JAN-WILHELM  
KORNFELD

2018-03-08

## Contents

|                                                              |          |
|--------------------------------------------------------------|----------|
| <b>Setup s·nr</b>                                            | <b>2</b> |
| Setup . . . . .                                              | 2        |
| Requirements . . . . .                                       | 2        |
| Download Required Files . . . . .                            | 3        |
| Quickstart: Example Script . . . . .                         | 4        |
| Monitor Docker Container . . . . .                           | 5        |
| Download public data . . . . .                               | 5        |
| Development . . . . .                                        | 5        |
| Run Node.js Server and Front-End in Developer Mode . . . . . | 5        |
| Launching Server Application with PM2 . . . . .              | 5        |
| Show Server Logs . . . . .                                   | 6        |
| Administration . . . . .                                     | 6        |
| Generate User File . . . . .                                 | 6        |
| Create new User Workflow . . . . .                           | 6        |
| Adding Data . . . . .                                        | 6        |
| Additional Information . . . . .                             | 7        |
| Source Repositories of s·nr . . . . .                        | 7        |

## Setup s·nr

Always up-to date installation instructions are located in <https://github.com/snr-vis/setup-snr>

### Setup

#### Requirements

- The only dependency for s·nr is docker. Please find the installation files for your system here: <https://www.docker.com/community-edition>.
- Make sure to have at least 10–15 GB of memory available for docker
- The public files occupy 7 GB of disk space
- We recommend using s·nr with [Google Chrome](#)

## Download Required Files

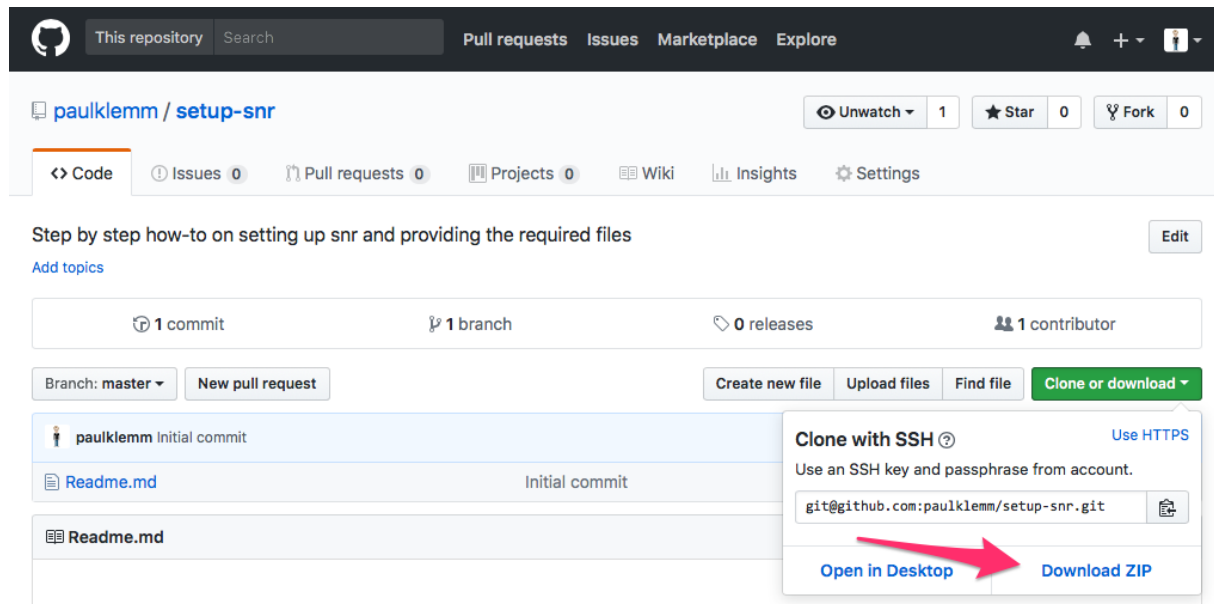

**Figure 1:** Download zip file of the project using GitHub's download function.

- Go to <https://github.com/snr-vis/setup-snr> and *either* clone the repository or download it as a zip (Fig. 1.).
- Go into the path of the downloaded repository and run the following commands:

```

1 # Download the public files
2 make
3 # Run docker
4 docker pull paulklemm/snr:paperrelease
5 docker run -t -d \
6     -p 85:85 \
7     -v $(pwd)/sonar:/home/opencpu/sonar \
8     --name snr \
9     paulklemm/snr:paperrelease

```

- Setting up the docker image can take a minute, depending on the system
- You can now access s-nr under <http://localhost:85/>
- Login: user: demo | pw: demo

Should you choose to expose the OpenCPU and RStudio instance running on the docker image, you can do so with the following call:

```

1 # Download the public files

```

```
2 make
3 # Run docker
4 docker pull paulklemm/snr:paperrelease
5 docker run -t -d \
6     -p 85:85 \
7     -p 8004:8004 \
8     -v $(pwd)/sonar:/home/opencpu/sonar \
9     --name snr \
10    paulklemm/snr:paperrelease
```

**This is not recommended and should only be used for development purposes** because the R session of OpenCPU can access the whole docker file image and therefore all data stored there.

You find the servers at the following paths:

- `<ip-of-docker-host-machine>:<port>/ocpu` (e.g. <http://localhost:8004/ocpu/>)
- `<ip-of-docker-host-machine>:<port>/rstudio` (e.g. <http://localhost:8004/rstudio/>)
  - Login for RStudio User/PW: `opencpu/opencpu`

### Quickstart: Example Script

This script requires a Unix (e.g. macOS or Linux) system with a running docker instance. It will download this repository and initialize s-nr.

```
1 # Setup snr directory
2 mkdir ~/snr
3 cd ~/snr
4 git clone https://github.com/snr-vis/setup-snr
5 cd setup-snr
6 # Download all public files
7 make
8 # Run the docker instance
9 docker pull paulklemm/snr:paperrelease
10 docker run -t -d \
11     -p 85:85 \
12     -v $(pwd)/sonar:/home/opencpu/sonar \
13     --name snr \
14    paulklemm/snr:paperrelease
```

## Monitor Docker Container

We recommend `ctop` (<https://ctop.sh/>) for monitoring the activity and memory usage of docker container.

## Download public data

The public data is available here <https://edmond.mpdl.mpg.de/imeji/collection/RVILY1vK1naj8au9>.

To add it to the bootstrap file system of this repository run `make` which will download the files to `<repo-path>/sonar/data/quickngs`.

## Development

### Run Node.js Server and Front-End in Developer Mode

For development it proves easier to run a instance of the `node.js` server and the react front-end app outside of the `docker` container.

For this you are required to run a docker instance exposing the `OpenCPU/RStudio` port using:

```
1 docker run -t -d \  
2   -p 8004:8004 \  
3   -v $(pwd)/sonar:/home/opencpu/sonar \  
4   --name snr \  
5   paulklemm/snr:paperrelease
```

Now, clone the `node.js` and front-end repo <https://github.com/snr-vis/snr> and edit the `server_settings.json` to point to the appropriate OpenCPU path (edit `"opencpuPath"`: `"http://localhost:8004"` line).

If you run the docker image on a separate machine that is behind a firewall you might forward the port using a command like `ssh -L 8004:localhost:8004 pklemm@aligner cat` to map the port to your `localhost`.

### Launching Server Application with PM2

The `docker container` launches the `node.js` server as well as the `react` front-end using the `PM2` process manager. `PM2` can also be used for development, whereas `pm2 monit` and `pm2 status` are most valuable tools to track console outputs and error messages of the processes. See details in the [dockerfile](#) on how to start `pm2`.

## Show Server Logs

Error messages are printed out by `PM2`. To access them, please attach a `pm2 monit` session to the already running docker container using the following command (assuming the name of the docker container is “snr”):

```
1 docker exec -it snr pm2 monit
```

To see if `pm2` is running properly, run:

```
1 docker exec -it snr pm2 status
```

## Administration

### Generate User File

The server’s API allows the create a user file by specifying path and password by calling: `http://<url_to_server>:<port>/api/makeuserfilejson?pw=mypassword&path=/home/opencpu/sonar/data`. You can use the response to create or edit the user files.

### Create new User Workflow

1. Create a new folder for the user in the folder that is linked to the `docker R` back-end and add the data there
2. Create a `dictionary.json` file in that folder (see [Structure of Data and OpenCPU Sessions](#))
3. Check `server_settings.json` file where the user configuration files are
4. Go to this directory and save the output of `http://<url_to_server>:<port>/api/makeuserfilejson?pw=<user_password>&path=<path_to_data_on_r_back_end>` to `<username>.json`
5. Log in to sonar with the new account

### Adding Data

Create a folder for the user that matches the path in the user configuration file and add the data here. Note that the folder should contain a `dictionary.json` file for fallback settings for all files within this folder. You can also add custom dictionary files per dataset by creating a `.json` dictionary with the same name as the added file. See the [demo](#) user folder for an example.

## Additional Information

Please refer to the readme of the `snr` repository (<https://github.com/snr-vis/snr>) for more details.

## Source Repositories of s·nr

Home of the repositories is <https://github.com/snr-vis>.

The source code of s·nr is distributed on these repositories:

---

| Link                                                                                                | Description                                                                                             |
|-----------------------------------------------------------------------------------------------------|---------------------------------------------------------------------------------------------------------|
| <a href="https://github.com/snr-vis/snr">https://github.com/snr-vis/snr</a>                         | Node . js back-end server and React front-end                                                           |
| <a href="https://github.com/snr-vis/snr-docker">https://github.com/snr-vis/snr-docker</a>           | Dockerfile for creating the docker image                                                                |
| <a href="https://github.com/snr-vis/snrgo">https://github.com/snr-vis/snrgo</a>                     | GO-term analysis R back-end package                                                                     |
| <a href="https://github.molgen.mpg.de/paulklemm/snr">https://github.molgen.mpg.de/paulklemm/snr</a> | R back-end package. <i>Repo on enterprise github because GIT Large File Storage support requirement</i> |
| <a href="https://github.com/snr-vis/setup-snr">https://github.com/snr-vis/setup-snr</a>             | Setup instructions for running a s·nr instance                                                          |

---
